# Supplementary material
Source: Springer Nature journal article supplement (https://www.springermedizin.de/resource/supplementary/12985_2012_1938_MOESM2_ESM.pdf/9610762)

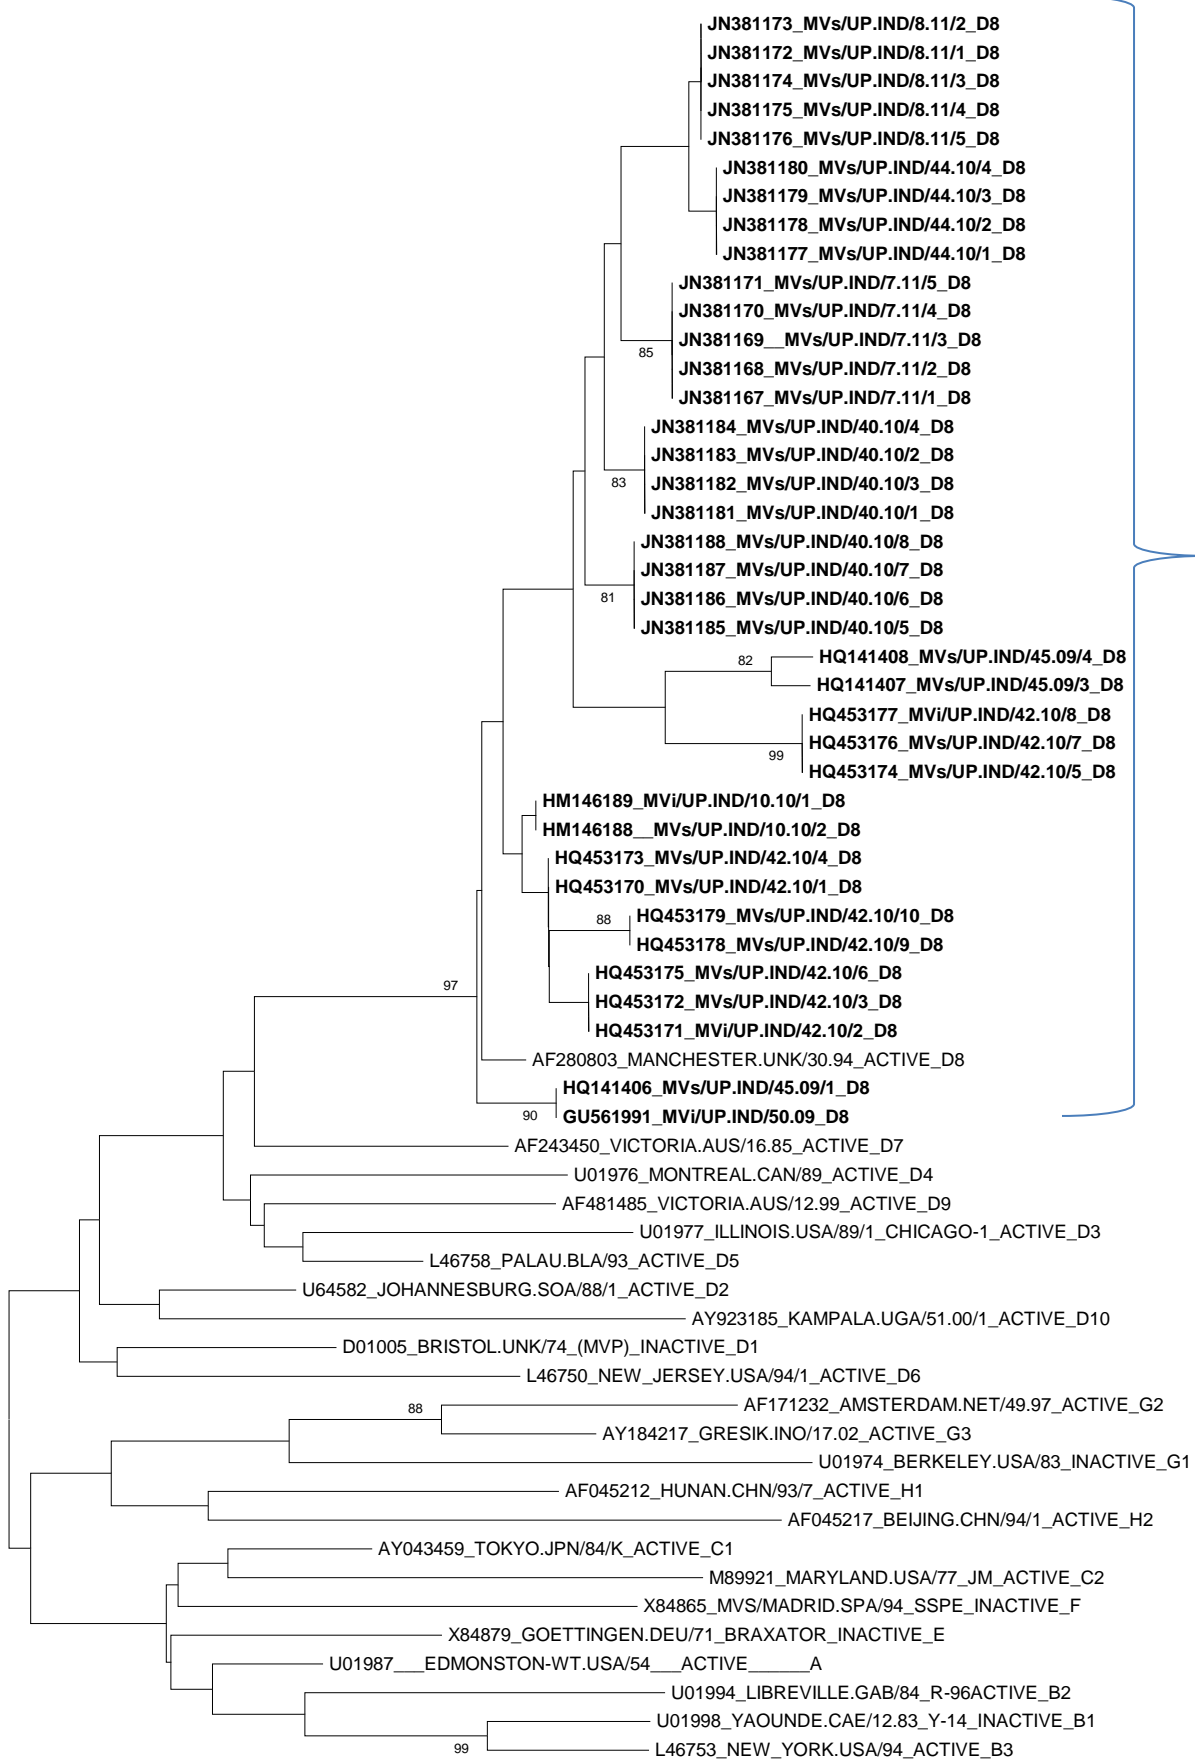

Strains  
obtained  
during  
study

0.005

Supplement: MOESM2 [file 9610762]
